# Supplementary material
Source: publisher figshare collection journal article supplement (https://tandf.figshare.com/ndownloader/files/15050948)
Supplement: Supplementary file 1 [file 15050948]

|  | Lowest 20% ND  (0.02% - 0.11%) | Middle 20% ND  (0.12% – 0.17%) | Highest 20% ND  (0.22% – 0.37%) |
| --- | --- | --- | --- |
| TNIE Odds Ratios for Binary Y | 0.99  (0.982 – 0.997) | 0.997  (0.987 – 1.004) | 0.992  (0.973 – 1.002) |
| PNDE (direct effects) Odds Ratios for Binary Y | 0.956  (0.827 – 1.049) | 1.019  (0.942 – 1.092) | 0.958  (0.912 – 1.003) |

Note: TNIE = Total Natural Indirect Effect for counterfactual analyses
